# Supplementary material for: Rapid and reliable detection and quantification of organophosphorus pesticides using SERS combined with dispersive liquid–liquid microextraction
Source: Royal Society of Chemistry journal article supplement (doi:10.1039/d2ay01321e), 2022-01-01
Supplement: d2ay01321e1.pdf [file d2ay01321e1.pdf]

Supporting information for:

## Rapid and Reliable Detection and Quantification of Organophosphorus Pesticides Using SERS Combined with Dispersive Liquid-Liquid Microextraction

Panxue Wang<sup>a</sup>, Xiang Li<sup>a</sup>, Yan Sun<sup>a</sup>, Li Wang<sup>a</sup>, Ying Xu<sup>a</sup>, and Guoliang Li<sup>a,\*</sup>

<sup>a</sup>School of Food Science and Engineering, Shaanxi University of Science & Technology, Xi'an 710021 · P.R. China.

\*Correspondence: [61254368@163.com](mailto:61254368@163.com)

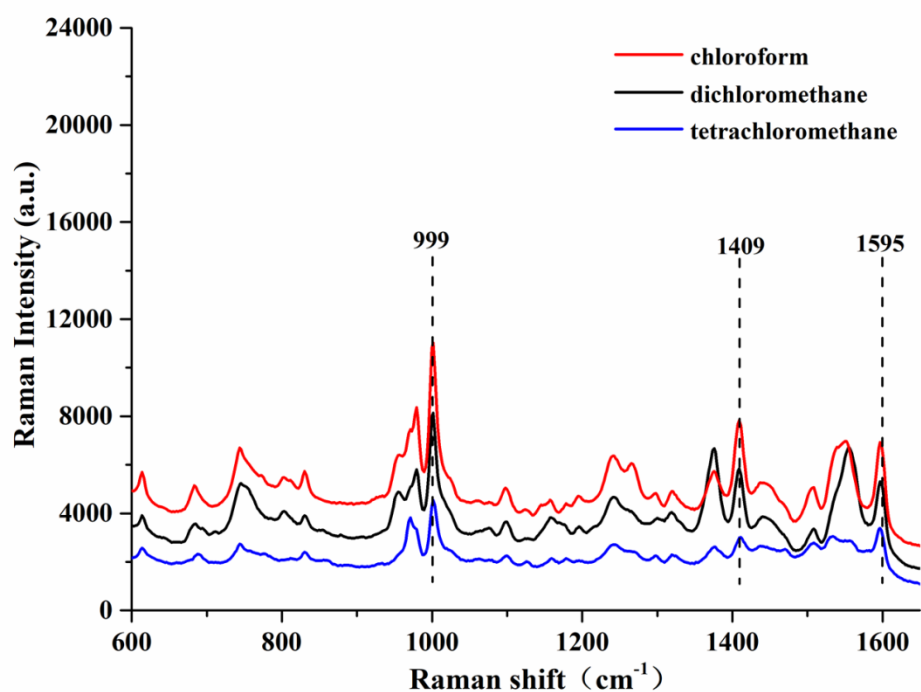

Figure. SI 1. SERS spectra of triazophos extracted by different extraction agents (dichloromethane, chloroform, tetrachloromethane)

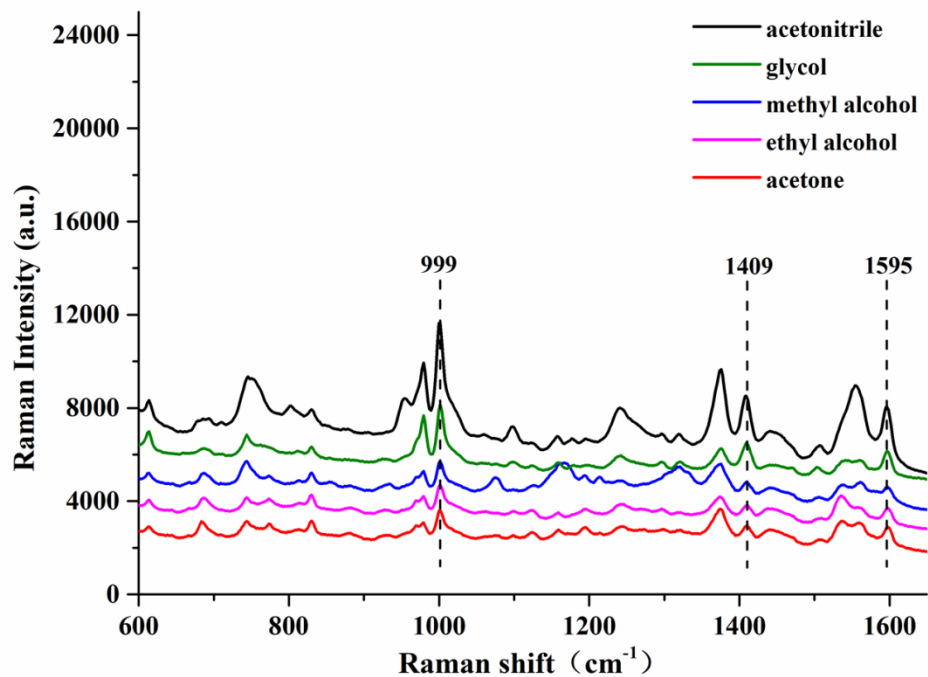

Figure. SI 2. SERS spectra of triazophos extracted with different dispersants (acetonitrile, acetone, methyl alcohol, glycol, ethyl alcohol)

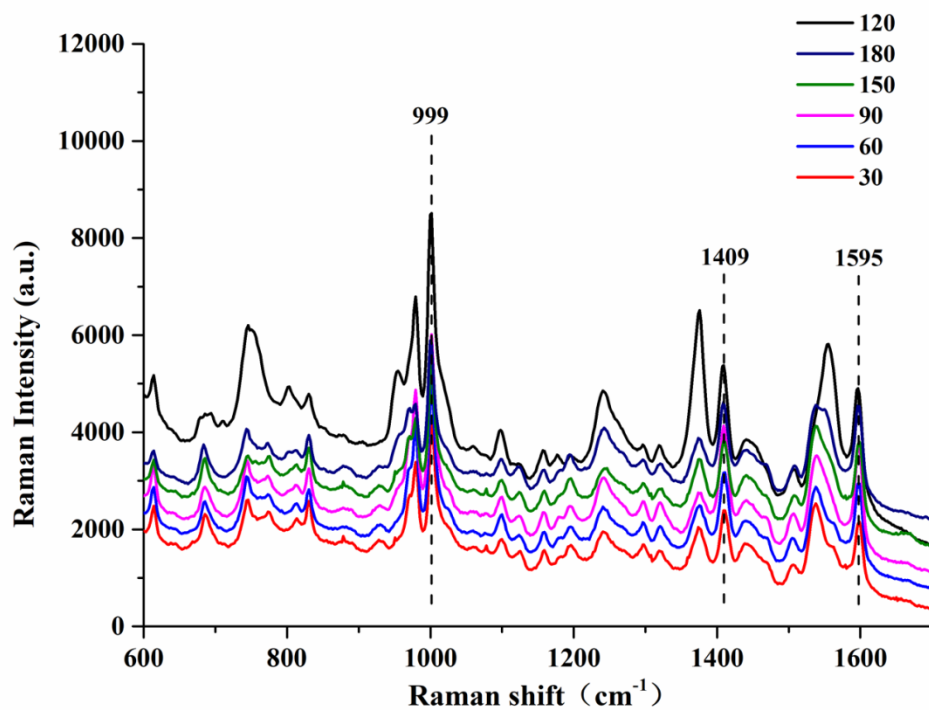

Figure. SI 3. SERS spectra of triazophos extracted with different volumes of dispersant

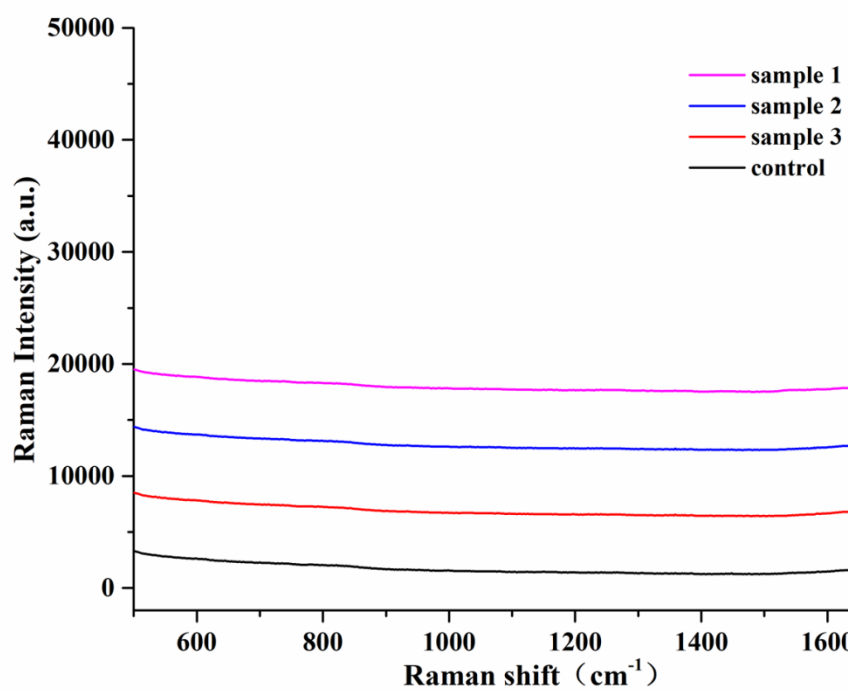

**Figure. SI 4.** SERS spectra of blind samples collected with the developed DLLME facilitated liquid SERS method
